# Supplementary material for: Effects of TiO2 nanoparticles on wheat (Triticum aestivum L.) seedlings cultivated under super-elevated and normal CO2 conditions
Source: PubMed Central journal article supplement (PMC5448767; doi:10.1371/journal.pone.0178088), 2017-05-30
Supplement: pone.0178088.s002.pdf [file pone.0178088.s002.pdf]

**S1 Table. Shoot fresh biomass**

| NPs<br>Concentration<br>(mg/L)       | CK                    |                                    | 10                   |                                    | 100                  |                                    | 1000                 |                                    |
|--------------------------------------|-----------------------|------------------------------------|----------------------|------------------------------------|----------------------|------------------------------------|----------------------|------------------------------------|
|                                      | Mean $\pm$ SD         | 95%                                | Mean $\pm$ SD        | 95%                                | Mean $\pm$ SD        | 95%                                | Mean $\pm$ SD        | 95%                                |
|                                      |                       | Confidence<br>Interval for<br>Mean |                      | Confidence<br>Interval for<br>Mean |                      | Confidence<br>Interval for<br>Mean |                      | Confidence<br>Interval for<br>Mean |
| Super-elevated<br>CO <sub>2</sub> /g | 0.1504 $\pm$ 0.0467a  | 0.1208-0.1801                      | 0.1426 $\pm$ 0.0281a | 0.1248-0.1604                      | 0.1077 $\pm$ 0.0391b | 0.0829-0.1326                      | 0.1072 $\pm$ 0.0272b | 0.0900-0.1245                      |
| Normal CO <sub>2</sub> /g            | 0.1137 $\pm$ 0.0255a* | 0.0941-0.1333                      | 0.1270 $\pm$ 0.0292a | 0.1046-0.1495                      | 0.1145 $\pm$ 0.0164a | 0.1019-0.1272                      | 0.1127 $\pm$ 0.0167a | 0.0998-0.1256                      |

Values are mean  $\pm$  SD (n $\geq$ 3). Letters represent significant difference (p<0.05) among TiO<sub>2</sub> NPs treatments under the same growth conditions; \* represents significant difference (p<0.05) between super-elevated CO<sub>2</sub> and normal CO<sub>2</sub> conditions at each TiO<sub>2</sub> NPs concentration
