# Supplementary material for: Effects of TiO2 nanoparticles on wheat (Triticum aestivum L.) seedlings cultivated under super-elevated and normal CO2 conditions
Source: PubMed Central journal article supplement (PMC5448767; doi:10.1371/journal.pone.0178088), 2017-05-30
Supplement: pone.0178088.s003.pdf [file pone.0178088.s003.pdf]

**S2 Table. Root fresh biomass**

| NPs<br>Concentration<br>(mg/L)       | CK                    |                                           | 10                    |                                           | 100                  |                                           | 1000                  |                                           |
|--------------------------------------|-----------------------|-------------------------------------------|-----------------------|-------------------------------------------|----------------------|-------------------------------------------|-----------------------|-------------------------------------------|
|                                      | Mean $\pm$ SD         | 95%<br>Confidence<br>Interval for<br>Mean | Mean $\pm$ SD         | 95%<br>Confidence<br>Interval for<br>Mean | Mean $\pm$ SD        | 95%<br>Confidence<br>Interval for<br>Mean | Mean $\pm$ SD         | 95%<br>Confidence<br>Interval for<br>Mean |
|                                      |                       |                                           |                       |                                           |                      |                                           |                       |                                           |
| Super-elevated<br>CO <sub>2</sub> /g | 0.0244 $\pm$ 0.0042a  | 0.02003—0.02822                           | 0.0261 $\pm$ 0.0051a  | 0.0212-0.0311                             | 0.0208 $\pm$ 0.0051a | 0.0163-0.0254                             | 0.0232 $\pm$ 0.0048a  | 0.0187-0.0276                             |
| Normal CO <sub>2</sub> /g            | 0.0161 $\pm$ 0.0027a* | 0.0140-0.0182                             | 0.0179 $\pm$ 0.0036a* | 0.0149-0.0209                             | 0.0128 $\pm$ 0.0026b | 0.0107-0.0150                             | 0.0126 $\pm$ 0.0015b* | 0.0113-0.0139                             |

Values are mean  $\pm$  SD (n $\geq$ 3). Letters represent significant difference (p<0.05) among TiO<sub>2</sub> NPs treatments under the same growth conditions; \* represents significant difference (p<0.05) between super-elevated CO<sub>2</sub> and normal CO<sub>2</sub> conditions at each TiO<sub>2</sub> NPs concentration.
