# Supplementary material for: Effects of TiO2 nanoparticles on wheat (Triticum aestivum L.) seedlings cultivated under super-elevated and normal CO2 conditions
Source: PubMed Central journal article supplement (PMC5448767; doi:10.1371/journal.pone.0178088), 2017-05-30
Supplement: pone.0178088.s004.pdf [file pone.0178088.s004.pdf]

**S3 Table. Number of lateral roots**

| NPs<br>Concentration<br>(mg/L)    | CK                |                                           | 10                 |                                           | 100                |                                           | 1000               |                                           |
|-----------------------------------|-------------------|-------------------------------------------|--------------------|-------------------------------------------|--------------------|-------------------------------------------|--------------------|-------------------------------------------|
|                                   | Mean $\pm$ SD     | 95%<br>Confidence<br>Interval for<br>Mean | Mean $\pm$ SD      | 95%<br>Confidence<br>Interval for<br>Mean | Mean $\pm$ SD      | 95%<br>Confidence<br>Interval for<br>Mean | Mean $\pm$ SD      | 95%<br>Confidence<br>Interval for<br>Mean |
| Super-elevated<br>CO <sub>2</sub> | 9.13 $\pm$ 1.45a  | 8.35-9.90                                 | 8.63 $\pm$ 1.5a    | 7.80-9.45                                 | 8.94 $\pm$ 1.24a   | 8.28-9.60                                 | 8.50 $\pm$ 1.26a   | 7.83-9.17                                 |
| Normal CO <sub>2</sub>            | 7.08 $\pm$ 1.08a* | 6.39-7.77                                 | 6.67 $\pm$ 0.65 a* | 6.25-7.08                                 | 6.67 $\pm$ 0.98 a* | 6.04-7.29                                 | 6.33 $\pm$ 0.78 a* | 5.84-6.83                                 |

Values are mean  $\pm$  SD (n $\geq$ 3). Letters represent significant difference (p<0.05) among TiO<sub>2</sub> NPs treatments under the same growth conditions; \* represents significant difference (p<0.05) between super-elevated CO<sub>2</sub> and normal CO<sub>2</sub> conditions at each TiO<sub>2</sub> NPs concentration.
