# Supplementary material for: Effects of TiO2 nanoparticles on wheat (Triticum aestivum L.) seedlings cultivated under super-elevated and normal CO2 conditions
Source: PubMed Central journal article supplement (PMC5448767; doi:10.1371/journal.pone.0178088), 2017-05-30
Supplement: pone.0178088.s005.pdf [file pone.0178088.s005.pdf]

**S4 Table. Shoot height**

| NPs<br>Concentration<br>(mg/L)        | CK                |                                    | 10                |                                    | 100               |                                    | 1000              |                                    |
|---------------------------------------|-------------------|------------------------------------|-------------------|------------------------------------|-------------------|------------------------------------|-------------------|------------------------------------|
|                                       | Mean $\pm$ SD     | 95%                                | Mean $\pm$ SD     | 95%                                | Mean $\pm$ SD     | 95%                                | Mean $\pm$ SD     | 95%                                |
|                                       |                   | Confidence<br>Interval for<br>Mean |                   | Confidence<br>Interval for<br>Mean |                   | Confidence<br>Interval for<br>Mean |                   | Confidence<br>Interval for<br>Mean |
| Super-elevated<br>CO <sub>2</sub> /cm | 14.34 $\pm$ 1.78a | 13.39-15.28                        | 13.77 $\pm$ 1.30a | 13.08-14.46                        | 14.10 $\pm$ 1.67a | 13.21-14.99                        | 13.16 $\pm$ 1.30a | 12.46-13.85                        |
| Normal CO <sub>2</sub> /cm            | 15.41 $\pm$ 1.60  | 14.39-16.42                        | 15.50 $\pm$ 1.90  | 14.29-16.71                        | 15.48 $\pm$ 1.56  | 14.49-16.48                        | 15.27 $\pm$ 1.60  | 14.25-16.28                        |

Values are mean  $\pm$  SD (n $\geq$ 3). Letters represent significant difference (p<0.05) among TiO<sub>2</sub> NPs treatments under the same growth conditions; \* represents significant difference (p<0.05) between super-elevated CO<sub>2</sub> and normal CO<sub>2</sub> conditions at each TiO<sub>2</sub> NPs concentration.
