# Supplementary material for: Effects of TiO2 nanoparticles on wheat (Triticum aestivum L.) seedlings cultivated under super-elevated and normal CO2 conditions
Source: PubMed Central journal article supplement (PMC5448767; doi:10.1371/journal.pone.0178088), 2017-05-30
Supplement: pone.0178088.s006.pdf [file pone.0178088.s006.pdf]

**S5 Table. Root length**

| NPs<br>Concentration<br>(mg/L)        | CK                 |                                    | 10                 |                                    | 100                |                                    | 1000              |                                    |
|---------------------------------------|--------------------|------------------------------------|--------------------|------------------------------------|--------------------|------------------------------------|-------------------|------------------------------------|
|                                       | Mean $\pm$ SD      | 95%                                | Mean $\pm$ SD      | 95%                                | Mean $\pm$ SD      | 95%                                | Mean $\pm$ SD     | 95%                                |
|                                       |                    | Confidence<br>Interval for<br>Mean |                    | Confidence<br>Interval for<br>Mean |                    | Confidence<br>Interval for<br>Mean |                   | Confidence<br>Interval for<br>Mean |
| Super-elevated<br>CO <sub>2</sub> /cm | 7.28 $\pm$ 2.03a   | 6.20-8.36                          | 8.51 $\pm$ 1.73a   | 7.58-9.43                          | 7.58 $\pm$ 1.11a   | 6.98-8.17                          | 7.11 $\pm$ 1.02a  | 6.57- 7.65                         |
| Normal CO <sub>2</sub> /cm            | 11.65 $\pm$ 4.22a* | 8.97-14.33                         | 10.53 $\pm$ 1.76a* | 9.42-11.65                         | 10.61 $\pm$ 3.28a* | 8.53-12.69                         | 9.82 $\pm$ 2.90a* | 7.97-11.66                         |

Values are mean  $\pm$  SD (n $\geq$ 3). Letters represent significant difference (p<0.05) among TiO<sub>2</sub> NPs treatments under the same growth conditions; \* represents significant difference (p<0.05) between super-elevated CO<sub>2</sub> and normal CO<sub>2</sub> conditions at each TiO<sub>2</sub> NPs concentration.
