# Supplementary material for: Effects of TiO2 nanoparticles on wheat (Triticum aestivum L.) seedlings cultivated under super-elevated and normal CO2 conditions
Source: PubMed Central journal article supplement (PMC5448767; doi:10.1371/journal.pone.0178088), 2017-05-30
Supplement: pone.0178088.s007.pdf [file pone.0178088.s007.pdf]

**S6 Table. Effects of TiO<sub>2</sub> NPs on phytohormone contents**

|                                          |      | ABA<br>(ng/g.FW) | BR<br>(ng/g.FW) | ZR<br>(ng/g.FW) | DHZR<br>(ng/g.FW) | GA <sub>3</sub><br>(ng/g.FW) | GA <sub>4</sub><br>(ng/g.FW) | IAA<br>(ng/g.FW) | IPA<br>(ng/g.FW) | JA<br>(ng/g.FW) |
|------------------------------------------|------|------------------|-----------------|-----------------|-------------------|------------------------------|------------------------------|------------------|------------------|-----------------|
| Super-elevated CO <sub>2</sub><br>(mg/L) | CK   | 92.01±2.05a      | 7.26±1.22a      | 10.69±0.55ab    | 6.42±0.96a        | 10.05±1.12a                  | 6.72±0.61a                   | 64.43±11.00a     | 6.67±0.53a       | 19.51±3.60aA    |
|                                          | 10   | 102.53±7.20a     | 6.05±0.99ab     | 9.79±0.84ab     | 7.51±0.58a        | 11.44±1.64a                  | 5.81±1.08ab                  | 57.18±12.44ab    | 6.99±1.35aA      | 22.40±3.92ab    |
|                                          | 100  | 107.13±13.01ab   | 7.72±1.59a      | 11.42±2.00a     | 7.07±1.93a        | 11.21±2.08a                  | 6.24±0.91a                   | 51.20±9.40ab     | 7.50±2.10aA      | 24.78±3.90abA   |
|                                          | 1000 | 122.82±14.57b    | 5.38±0.83bA     | 8.64±1.17bA     | 7.57±0.89a        | 11.33±1.68a                  | 4.90±0.68bA                  | 45.42±8.61b      | 7.09±1.22aA      | 27.46±5.68b     |
| Normal CO <sub>2</sub> (mg/L)            | CK   | 93.67±9.29a      | 7.63±1.28a      | 10.55±1.09ab    | 7.32±1.14a        | 10.48±2.08a                  | 6.35±1.02a                   | 43.11±13.85a     | 9.93±1.97a       | 28.50±1.62aB    |
|                                          | 10   | 107.61±7.78ab    | 8.86±5.90a      | 10.37±0.98a     | 8.12±1.44a        | 10.73±2.71a                  | 7.00±0.74a                   | 53.27±17.36a     | 10.45±1.43aB     | 30.56±5.55a     |
|                                          | 100  | 119.29±9.41b     | 8.35±1.29a      | 13.44±1.63b     | 7.15±1.08a        | 12.46±2.21a                  | 7.47±0.55a                   | 53.63±4.01a      | 11.29±1.13aB     | 31.34±1.77aB    |
|                                          | 1000 | 107.20±13.65ab   | 9.34±1.77aB     | 13.07±2.35abB   | 7.18±1.29a        | 10.85±2.29a                  | 7.87±1.32aB                  | 64.88±16.69a     | 10.45±0.11aB     | 29.67±3.32a     |

Values are mean ± SD (n=3). Lowercase letters represent significant difference (p<0.05) among TiO<sub>2</sub> NPs treatments under the same growth conditions; Uppercase letters represent significant difference (p<0.05) between super-elevated CO<sub>2</sub> and normal CO<sub>2</sub> conditions at each TiO<sub>2</sub> NPs concentration.
