# Supplementary material for: Effects of TiO2 nanoparticles on wheat (Triticum aestivum L.) seedlings cultivated under super-elevated and normal CO2 conditions
Source: PubMed Central journal article supplement (PMC5448767; doi:10.1371/journal.pone.0178088), 2017-05-30
Supplement: pone.0178088.s008.pdf [file pone.0178088.s008.pdf]

**S7 Table. Content of Ti in shoots**

| NPs<br>Concentration<br>(mg/L)        | CK         |                                           | 10         |                                           | 100          |                                           | 1000         |                                           |
|---------------------------------------|------------|-------------------------------------------|------------|-------------------------------------------|--------------|-------------------------------------------|--------------|-------------------------------------------|
|                                       | Mean±SD    | 95%<br>Confidence<br>Interval for<br>Mean | Mean±SD    | 95%<br>Confidence<br>Interval for<br>Mean | Mean±SD      | 95%<br>Confidence<br>Interval for<br>Mean | Mean±SD      | 95%<br>Confidence<br>Interval for<br>Mean |
| Super-elevated<br>CO <sub>2</sub> /cm | 3.89±1.00a | 1.32- 6.47                                | 6.17±2.26b | -14.16-26.50                              | 26.11±7.75c  | 6.87-45.36                                | 74.79±21.92d | 20.33-129.25                              |
| Normal CO <sub>2</sub> /cm            | 2.28±0.81a | 0.26-4.29                                 | 4.89±1.22b | 1.87-7.91                                 | 14.06±3.36c* | -16.12-44.23                              | 64.36±2.60d  | 57.90-70.82                               |

Values are mean  $\pm$  SD (n $\geq$ 3). Letters represent significant difference (p<0.05) among TiO<sub>2</sub> NPs treatments under the same growth conditions; \* represents significant difference (p<0.05) between super-elevated CO<sub>2</sub> and normal CO<sub>2</sub> conditions at each TiO<sub>2</sub> NPs concentration.
