# Supplementary material for: Effects of TiO2 nanoparticles on wheat (Triticum aestivum L.) seedlings cultivated under super-elevated and normal CO2 conditions
Source: PubMed Central journal article supplement (PMC5448767; doi:10.1371/journal.pone.0178088), 2017-05-30
Supplement: pone.0178088.s009.pdf [file pone.0178088.s009.pdf]

**S8 Table. Content of Ti in roots**

| NPs<br>Concentration<br>(mg/L)        | CK            |                                    | 10             |                                    | 100                 |                                    | 1000                  |                                    |
|---------------------------------------|---------------|------------------------------------|----------------|------------------------------------|---------------------|------------------------------------|-----------------------|------------------------------------|
|                                       | Mean±SD       | 95%                                | Mean±SD        | 95%                                | Mean±SD             | 95%                                | Mean±SD               | 95%                                |
|                                       |               | Confidence<br>Interval for<br>Mean |                | Confidence<br>Interval for<br>Mean |                     | Confidence<br>Interval for<br>Mean |                       | Confidence<br>Interval for<br>Mean |
| Super-elevated<br>CO <sub>2</sub> /cm | 24.26 ± 3.24a | -4.84-53.36                        | 94.30 ± 18.73b | 47.78-140.83                       | 266.64 ±<br>107.66c | -0.800-534.09                      | 2080.98 ±<br>170.79d  | 546.51-3615.44                     |
| Normal CO <sub>2</sub> /cm            | 16.60 ± 6.99a | -46.17-79.37                       | 67.80 ± 9.98b  | -21.91-157.51                      | 188.27 ±<br>53.30c  | 55.87-320.66                       | 1134.49 ±<br>165.46d* | -352.14-2621.12                    |

Values are mean ± SD (n ≥ 3). Letters represent significant difference (p < 0.05) among TiO<sub>2</sub> NPs treatments under the same growth conditions; \* represents significant difference (p < 0.05) between super-elevated CO<sub>2</sub> and normal CO<sub>2</sub> (plant growth chamber) conditions at each TiO<sub>2</sub> NPs concentration.
