# Supplementary material for: Effects of TiO2 nanoparticles on wheat (Triticum aestivum L.) seedlings cultivated under super-elevated and normal CO2 conditions
Source: PubMed Central journal article supplement (PMC5448767; doi:10.1371/journal.pone.0178088), 2017-05-30
Supplement: pone.0178088.s010.pdf [file pone.0178088.s010.pdf]

|                                | Treatment | Content of ABA (ng/g. FW) | Content of IAA (ng/g. FW) | Content of ZR (ng/g. FW) | Content of GA3 (ng/g. FW) | Content of BR (ng/g. FW) | Content of JA (ng/g. FW) | Content of IPA (ng/g. FW) | Content of GA4 (ng/g. FW) | Content of DNZR (ng/g. FW) |
|--------------------------------|-----------|---------------------------|---------------------------|--------------------------|---------------------------|--------------------------|--------------------------|---------------------------|---------------------------|----------------------------|
| Super-elevated CO <sub>2</sub> | CK-1      | 91.04                     | 68.57                     | 9.44                     | 9.72                      | 5.91                     | 18.90                    | 6.05                      | 6.03                      | 6.74                       |
|                                | CK-2      | 89.66                     | 59.43                     | 12.11                    | 10.37                     | 7.06                     | 16.81                    | 6.54                      | 6.38                      | 5.90                       |
|                                | CK-3      | 93.14                     | 52.21                     | 9.25                     | 11.39                     | 7.20                     | 17.56                    | 6.76                      | 7.21                      | 5.43                       |
|                                | CK-4      | 94.21                     | 77.52                     | 11.96                    | 8.74                      | 8.87                     | 24.74                    | 7.34                      | 7.26                      | 7.61                       |
|                                | 10-1      | 92.44                     | 60.11                     | 8.70                     | 11.39                     | 5.54                     | 18.90                    | 6.74                      | 6.22                      | 7.63                       |
|                                | 10-2      | 103.81                    | 47.46                     | 9.66                     | 10.94                     | 4.91                     | 26.12                    | 7.08                      | 4.41                      | 6.94                       |
|                                | 10-3      | 104.40                    | 47.57                     | 10.11                    | 13.68                     | 6.66                     | 19.11                    | 5.42                      | 5.66                      | 7.21                       |
|                                | 10-4      | 109.48                    | 73.57                     | 10.70                    | 9.76                      | 7.07                     | 25.45                    | 8.71                      | 6.97                      | 8.26                       |
|                                | 100-1     | 106.40                    | 47.35                     | 10.39                    | 12.96                     | 7.06                     | 26.93                    | 5.67                      | 5.34                      | 6.41                       |
|                                | 100-2     | 103.61                    | 61.91                     | 12.06                    | 10.22                     | 8.37                     | 25.40                    | 9.31                      | 6.66                      | 5.95                       |
|                                | 100-3     | 93.67                     | 44.33                     | 9.32                     | 12.91                     | 5.89                     | 19.11                    | 5.69                      | 5.65                      | 5.96                       |
|                                | 100-4     | 124.84                    | 98.40                     | 13.90                    | 8.75                      | 9.57                     | 27.70                    | 9.33                      | 7.32                      | 9.94                       |
|                                | 1000-1    | 143.16                    | 48.99                     | 9.72                     | 13.30                     | 5.38                     | 21.96                    | 6.88                      | 4.27                      | 7.46                       |
|                                | 1000-2    | 118.36                    | 36.80                     | 8.56                     | 10.39                     | 4.75                     | 35.40                    | 8.76                      | 4.82                      | 7.08                       |
|                                | 1000-3    | 108.65                    | 40.12                     | 7.03                     | 12.08                     | 4.84                     | 25.79                    | 5.81                      | 4.64                      | 6.88                       |
|                                | 1000      | 121.10                    | 55.76                     | 9.25                     | 9.56                      | 6.56                     | 26.70                    | 6.93                      | 5.86                      | 8.84                       |

|                           |        |        |       |       |       |       |       |       |      |      |
|---------------------------|--------|--------|-------|-------|-------|-------|-------|-------|------|------|
|                           | -4     |        |       |       |       |       |       |       |      |      |
| Normal<br>CO <sub>2</sub> | CK-1   | 88.14  | 36.47 | 11.02 | 12.88 | 6.24  | 27.88 | 8.58  | 5.97 | 8.13 |
|                           | CK-2   | 104.40 | 59.02 | 11.32 | 9.21  | 8.78  | 30.34 | 12.20 | 7.50 | 7.82 |
|                           | CK-3   | 88.48  | 33.83 | 9.30  | 9.35  | 7.86  | 27.28 | 9.01  | 5.58 | 6.01 |
|                           | 10-1   | 101.46 | 69.99 | 11.37 | 8.63  | 15.58 | 31.35 | 11.29 | 7.85 | 9.76 |
|                           | 10-2   | 105.00 | 35.32 | 9.42  | 13.79 | 4.50  | 23.59 | 8.80  | 6.50 | 7.09 |
|                           | 10-3   | 116.35 | 54.51 | 10.31 | 9.78  | 6.50  | 36.73 | 11.27 | 6.66 | 7.50 |
|                           | 100-1  | 126.51 | 57.05 | 13.44 | 13.30 | 7.53  | 33.17 | 11.92 | 8.03 | 6.40 |
|                           | 100-2  | 108.65 | 54.64 | 11.81 | 9.96  | 7.68  | 29.63 | 11.98 | 7.44 | 8.39 |
|                           | 100-3  | 122.72 | 49.22 | 15.08 | 14.13 | 9.84  | 31.21 | 9.99  | 6.94 | 6.66 |
|                           | 1000-1 | 108.45 | 47.35 | 11.76 | 10.77 | 7.43  | 30.34 | 10.58 | 6.95 | 5.72 |
|                           | 1000-2 | 92.96  | 80.57 | 15.78 | 13.17 | 10.94 | 26.07 | 10.37 | 9.39 | 8.15 |
|                           | 1000-3 | 120.18 | 66.73 | 11.66 | 8.60  | 9.65  | 32.60 | 10.39 | 7.27 | 7.68 |

|                              | Treatment            | Shoot Ti content ( $\mu\text{g/g DW}$ ) | Root Ti content |
|------------------------------|----------------------|-----------------------------------------|-----------------|
| Super-elevated $\text{CO}_2$ | CK-1                 | 4.08                                    | 27.98           |
|                              | CK-2                 | 3.86                                    | 22.08           |
|                              | CK-3                 | 3.72                                    | 22.71           |
|                              | 10-1                 | 8.34                                    | 102.39          |
|                              | 10-2                 | 3.83                                    | 107.63          |
|                              | 10-3                 | 6.35                                    | 72.89           |
|                              | 100-1                | 21.65                                   | 385.00          |
|                              | 100-2                | 27.63                                   | 240.40          |
|                              | 100-3                | 29.06                                   | 174.53          |
|                              | 1000-1               | 58.84                                   | 2201.74         |
|                              | 1000-2               | 99.79                                   | 1960.21         |
|                              | 1000-3               | 65.74                                   | 2596.05         |
|                              | Normal $\text{CO}_2$ | CK-1                                    | 3.21            |
| CK-2                         |                      | 1.75                                    | 17.00           |
| CK-3                         |                      | 1.87                                    | 21.00           |
| 10-1                         |                      | 3.55                                    | 60.87           |
| 10-2                         |                      | 5.20                                    | 63.21           |
| 10-3                         |                      | 5.92                                    | 79.20           |
| 100-1                        |                      | 11.68                                   | 127.16          |
| 100-2                        |                      | 16.43                                   | 225.14          |
| 100-3                        |                      | 14.05                                   | 212.50          |
| 1000-1                       |                      | 61.66                                   | 1017.49         |
| 1000-2                       |                      | 64.56                                   | 1251.49         |
| 1000-3                       |                      | 66.85                                   | 1100.00         |

|                    |       | number of lateral root | Shoot biomass(g) | root biomass | Shoot height(cm) | Root length |
|--------------------|-------|------------------------|------------------|--------------|------------------|-------------|
| Super-elevated CO2 | CK-1  | 9                      | 0.1364           | 0.0191       | 12               | 5.2         |
|                    | CK-2  | 8                      | 0.17             | 0.0288       | 14.6             | 8.1         |
|                    | CK-3  | 10                     | 0.1417           | 0.037        | 15.5             | 8.6         |
|                    | CK-4  | 10                     | 0.2088           | 0.0303       | 12.8             | 5.1         |
|                    | CK-5  | 9                      | 0.2055           | 0.0383       | 16.6             | 10.6        |
|                    | CK-6  | 7                      | 0.2146           | 0.0198       | 17.5             | 7.4         |
|                    | CK-7  | 10                     | 0.1566           | 0.0211       | 16.3             | 8.6         |
|                    | CK-8  | 9                      | 0.0958           | 0.0152       | 16.1             | 10.5        |
|                    | CK-9  | 11                     | 0.0795           | 0.0236       | 11.3             | 6.1         |
|                    | CK-10 | 8                      | 0.1503           | 0.0262       | 13               | 10.3        |
|                    | CK-11 | 12                     | 0.0832           | 0.026        | 15.5             | 5.6         |
|                    | CK-12 | 10                     | 0.1629           | \            | 13               | 5.2         |
|                    | CK-13 | 10                     | \                | \            | 13.6             | 8.1         |
|                    | CK-14 | 7                      | \                | \            | 13.8             | 5.2         |
|                    | CK-15 | 7                      | \                | \            | 13.3             | 5.2         |
|                    | CK-16 | \                      | \                | \            | 14.5             | 6.7         |
|                    | 10-1  | 9                      | 0.1732           | 0.0293       | 15.1             | 10.9        |
|                    | 10-2  | 9                      | 0.1619           | 0.0184       | 15.3             | 7.6         |
|                    | 10-3  | 11                     | 0.1681           | 0.0186       | 15.1             | 8.9         |
|                    | 10-4  | 8                      | 0.138            | 0.0275       | 12.1             | 8.7         |
|                    | 10-5  | 6                      | 0.0955           | 0.0177       | 15.5             | 6.5         |
|                    | 10-6  | 8                      | 0.1711           | 0.0305       | 14.5             | 8.4         |
|                    | 10-7  | 8                      | 0.1084           | 0.018        | 12.8             | 7.4         |
|                    | 10-8  | 9                      | 0.1621           | 0.0277       | 14.2             | 8.9         |

|        |    |        |        |      |     |
|--------|----|--------|--------|------|-----|
| 10-9   | 9  | 0.1363 | 0.0309 | 12.5 | 8.9 |
| 10-10  | 10 | 0.163  | 0.0365 | 13.2 | 4.5 |
| 10-11  | 6  | 0.1043 | \      | 11.3 | 7.1 |
| 10-12  | 12 | 0.1295 | \      | 13.4 | 8.2 |
| 10-13  | 8  | \      | \      | 13.4 | 9.5 |
| 10-14  | 9  | \      | \      | 13   | 9   |
| 10-15  | 8  | \      | \      | 15.5 | 9.6 |
| 10-16  | 8  | \      | \      | 13.4 | 12  |
| 100-1  | 8  | 0.0555 | 0.0178 | 13.9 | 6.4 |
| 100-2  | 7  | 0.0834 | 0.0318 | 15.5 | 8.6 |
| 100-3  | 10 | 0.1487 | 0.0197 | 13.8 | 8.3 |
| 100-4  | 8  | 0.1091 | 0.0242 | 13.1 | 6   |
| 100-5  | 10 | 0.1176 | 0.0172 | 16.4 | 8.8 |
| 100-6  | 9  | 0.1388 | 0.0235 | 16.9 | 8.2 |
| 100-7  | 8  | 0.0777 | 0.016  | 14.5 | 8.7 |
| 100-8  | 8  | 0.1885 | 0.0165 | 12.1 | 8   |
| 100-9  | 11 | 0.0644 | 0.0003 | 14.1 | 9.2 |
| 100-10 | 11 | 0.0753 | 0.0206 | 12.9 | 7.3 |
| 100-11 | 9  | 0.1277 | \      | 11   | 6.7 |
| 100-12 | 9  | 0.1058 | \      | 14.2 | 8.5 |
| 100-13 | 9  | \      | \      | 16.3 | 5.9 |
| 100-14 | 9  | \      | \      | 13.6 | 7.5 |
| 100-15 | 7  | \      | \      | 12.1 | 6.1 |
| 100-16 | 10 | \      | \      | 15.2 | 7   |
| 1000-1 | 10 | 0.1085 | 0.0185 | 13.5 | 7.5 |

|                        |         |    |        |        |      |      |
|------------------------|---------|----|--------|--------|------|------|
|                        | 1000-2  | 8  | 0.0545 | 0.0257 | 10.2 | 6.2  |
|                        | 1000-3  | 9  | 0.1449 | 0.0358 | 13.2 | 5.2  |
|                        | 1000-4  | 10 | 0.1412 | 0.0365 | 13.5 | 5.9  |
|                        | 1000-5  | 9  | 0.1221 | 0.038  | 15.6 | 8    |
|                        | 1000-6  | 10 | 0.12   | 0.0204 | 13.5 | 8.1  |
|                        | 1000-7  | 10 | 0.1077 | 0.0187 | 15   | 8.1  |
|                        | 1000-8  | 9  | 0.0883 | 0.0139 | 12.1 | 7.6  |
|                        | 1000-9  | 9  | 0.0738 | 0.0255 | 13.4 | 6.6  |
|                        | 1000-10 | 6  | 0.0911 | 0.0214 | 12.4 | 6    |
|                        | 1000-11 | 7  | 0.1025 | 0.0319 | 14.2 | 7    |
|                        | 1000-12 | 8  | 0.1323 | \      | 13.6 | 7.7  |
|                        | 100-13  | 7  | \      | \      | 12.8 | 7    |
|                        | 100-14  | 7  | \      | \      | 13.1 | 6.2  |
|                        | 100-15  | 9  | \      | \      | 11.2 | 7.8  |
|                        | 100-16  | 8  | \      | \      | 13.2 | 8.9  |
| Normal CO <sub>2</sub> | CK-1    | 8  | 0.1285 | 0.016  | 14.5 | 15.8 |
|                        | CK-2    | 7  | 0.0816 | 0.015  | 19   | 17   |
|                        | CK-3    | 6  | 0.0973 | 0.015  | 17.3 | 18.1 |
|                        | CK-4    | 6  | 0.0987 | 0.0144 | 15.5 | 12.1 |
|                        | CK-5    | 6  | 0.0874 | 0.0126 | 13.7 | 7.8  |
|                        | CK-6    | 6  | 0.1099 | 0.0136 | 14.2 | 7    |
|                        | CK-7    | 8  | 0.125  | 0.0203 | 15.5 | 6.1  |
|                        | CK-8    | 7  | 0.1609 | 0.0188 | 14.8 | 7    |
|                        | CK-9    | 9  | 0.1337 | 0.0192 | 14.8 | 11   |
|                        | CK-10   | 8  | \      | \      | 17.1 | 10.2 |

|        |   |        |        |      |      |
|--------|---|--------|--------|------|------|
| CK-11  | 8 | \      | \      | 14.1 | 15.8 |
| CK-12  | 6 | \      | \      | 14.4 | 11.9 |
| 10-1   | 6 | 0.1594 | 0.0237 | 16.2 | 13   |
| 10-2   | 7 | 0.159  | 0.0211 | 14.8 | 9.5  |
| 10-3   | 7 | 0.124  | 0.0128 | 19   | 10.8 |
| 10-4   | 6 | 0.1543 | 0.0143 | 16   | 10.2 |
| 10-5   | 8 | 0.1256 | 0.0156 | 17.4 | 9.1  |
| 10-6   | 7 | 0.072  | 0.0198 | 14   | 10.1 |
| 10-7   | 7 | 0.1191 | 0.0176 | 17.2 | 8.8  |
| 10-8   | 6 | 0.0975 | 0.0184 | 14.1 | 7.5  |
| 10-9   | 6 | 0.1325 | \      | 11.8 | 12.8 |
| 10-10  | 6 | \      | \      | 14.5 | 12.2 |
| 10-11  | 7 | \      | \      | 16.1 | 12.5 |
| 10-12  | 7 | \      | \      | 14.9 | 9.9  |
| 100-1  | 8 | 0.1237 | 0.0146 | 19.3 | 9.1  |
| 100-2  | 7 | 0.1175 | 0.0151 | 16.4 | 8.7  |
| 100-3  | 8 | 0.1097 | 0.0088 | 15.3 | 8.5  |
| 100-4  | 6 | 0.1097 | 0.0148 | 16   | 8.8  |
| 100-5  | 6 | 0.1146 | 0.0153 | 15.3 | 11.5 |
| 100-6  | 5 | 0.083  | 0.0121 | 13.1 | 13.1 |
| 100-7  | 6 | 0.1401 | 0.0122 | 15.2 | 16.1 |
| 100-8  | 6 | 0.1297 | 0.0096 | 15   | 17.6 |
| 100-9  | 8 | 0.1028 | \      | 15.5 | 8.1  |
| 100-10 | 6 | \      | \      | 13.3 | 8.3  |
| 100-11 | 7 | \      | \      | 15.3 | 8.8  |

|         |   |        |        |      |      |
|---------|---|--------|--------|------|------|
| 100-12  | 7 | \      | \      | 16.1 | 8.7  |
| 1000-1  | 7 | 0.1469 | 0.0133 | 16.5 | 14.5 |
| 1000-2  | 7 | 0.1166 | 0.0144 | 15.5 | 14.1 |
| 1000-3  | 7 | 0.1009 | 0.0107 | 17.3 | 9.6  |
| 1000-4  | 7 | 0.1066 | 0.0133 | 15.4 | 14.5 |
| 1000-5  | 6 | 0.1286 | 0.0119 | 16.9 | 7.7  |
| 1000-6  | 5 | 0.1001 | 0.0109 | 14.3 | 9.8  |
| 1000-7  | 7 | 0.1138 | 0.0135 | 14.5 | 8.2  |
| 1000-8  | 6 | 0.0913 | \      | 12.7 | 7.8  |
| 1000-9  | 6 | 0.1094 | \      | 15.5 | 7    |
| 1000-10 | 5 | \      | \      | 14.9 | 7.6  |
| 1000-11 | 7 | \      | \      | 17.2 | 9.7  |
| 1000-12 | 6 | \      | \      | 12.5 | 7.3  |
